1 **Title: Divergent Connectional Asymmetries of the Inferior Parietal Lobule Shape**

2 **Hemispheric Specialization in Humans, Chimpanzees, and Macaque Monkeys**

3 **Short title:** Comparative Study of IPL Connectional Asymmetry

4 Luqi Cheng<sup>1,2,3</sup>, Yuanchao Zhang<sup>1</sup>, Gang Li<sup>2,3,5</sup>, Jiaojian Wang<sup>1,6</sup>, William D.

5 Hopkins<sup>7</sup>, Chet C. Sherwood<sup>8</sup>, Gaolang Gong<sup>9,10</sup>, Linzhong Fan<sup>2,3,4,5,\*</sup>, Tianzi

6 Jiang<sup>1,2,3,4,5,11,\*</sup>

7 <sup>1</sup>Key Laboratory for NeuroInformation of Ministry of Education, School of Life Science and

8 Technology, University of Electronic Science and Technology of China, Chengdu 610054, China

9 <sup>2</sup>Brainnetome Center, Institute of Automation, Chinese Academy of Sciences, Beijing 100190,

10 China

11 <sup>3</sup>National Laboratory of Pattern Recognition, Institute of Automation, Chinese Academy of

12 Sciences, Beijing 100190, China

13 <sup>4</sup>CAS Center for Excellence in Brain Science and Intelligence Technology, Institute of Automation,

14 Chinese Academy of Sciences, Beijing 100190, China

15 <sup>5</sup>School of Artificial Intelligence, University of Chinese Academy of Sciences, Beijing 100190,

16 China

17 <sup>6</sup>Center for Language and Brain, Shenzhen Institute of Neuroscience, Shenzhen 518057, China

18 <sup>7</sup>Keeling Center for Comparative Medicine and Research, The University of Texas MD Anderson

19 Cancer Center, Bastrop, Texas

20 <sup>8</sup>Department of Anthropology and Center for the Advanced Study of Human Paleobiology, The

21 George Washington University, Washington, DC 20052, USA

22 <sup>9</sup>State Key Laboratory of Cognitive Neuroscience and Learning & IDG/McGovern Institute for

23 Brain Research, Beijing Normal University, Beijing 100875, China

24 <sup>10</sup>Beijing Key Laboratory of Brain Imaging and Connectomics, Beijing Normal University,

25 Beijing 100875, China

26 <sup>11</sup>The Queensland Brain Institute, University of Queensland, Brisbane, QLD 4072, Australia

27

28 **\*Corresponding Author: Tianzi Jiang**, Institute of Automation, Chinese Academy of Sciences,

29 Beijing 100190, China. Email: [jiangtz@nlpr.ia.ac.cn](mailto:jiangtz@nlpr.ia.ac.cn), Phone: 010 - 82544778, Fax: 010 -

30 82544777.

31 **\*Co-Corresponding Author: Lingzhong Fan**, Institute of Automation, Chinese Academy of

32 Sciences, Beijing 100190, China. Email: [lingzhong.fan@ia.ac.cn](mailto:lingzhong.fan@ia.ac.cn), Phone: 010 - 82544523.

33

34 **Abstract**

35 The inferior parietal lobule (IPL) is one of the most expanded and structurally and  
36 functionally asymmetric regions in the human cerebral cortex. Whether the structural  
37 and connectional asymmetries of IPL subdivisions differ across primate species and  
38 whether this relates to functional asymmetries remain unclear. We identified IPL  
39 subregions that exhibited symmetric positive allometric scaling across macaque  
40 monkeys, chimpanzees, and humans. Patterns of IPL subregions asymmetry were  
41 similar in chimpanzees and humans, whereas no IPL asymmetries were evident in  
42 macaques. Among the comparative sample of primates, humans showed the most  
43 widespread asymmetric connections in the frontal, parietal, and temporal cortices,  
44 constituting leftward asymmetric networks that may provide an anatomical basis for  
45 language and tool use. Unique human asymmetric connectivity between the IPL and  
46 the primary motor cortex may be related to handedness. These findings suggest that  
47 structural and connectional asymmetries may underlie hemispheric specialization of  
48 the human brain.

49

50

51 **Keywords:** inferior parietal lobule; brain asymmetry; brain evolution; anatomical  
52 connectivity; parcellation

53

54

## 55 **Introduction**

56 The association cortex has expanded greatly in size and exhibits modified  
57 connectivity patterns in human brain evolution <sup>1, 2, 3, 4</sup>. Compared to the primary  
58 sensory and motor cortical regions, the association cortex displays disproportionate  
59 expansion in conjunction with overall neocortical volume enlargement across  
60 primates <sup>5</sup>. Accordingly, association areas comprise a large percentage of the  
61 neocortex in human brains <sup>2, 6, 7</sup>. Functional and neuroanatomical asymmetries are  
62 pronounced in the human brain, appearing to be more extreme compared with other  
63 primate species, especially in the association cortex <sup>8</sup>. Recent evidence suggests that  
64 cerebral asymmetry exists not only in humans but also in nonhuman primates <sup>9, 10</sup>. For  
65 example, olive baboons and chimpanzees showed population-level leftward  
66 volumetric asymmetry in the planum temporale, which is thought to be homologous  
67 to part of Wernicke's area in humans and may have played a facilitating role in the  
68 evolution of spoken language <sup>11, 12</sup>. Comparative studies on brain asymmetry are  
69 crucial for understanding the evolution and function of the modern human brain.

70 Language and complex tool use, which show considerable lateralization in the human  
71 brain, are considered to be universal features of humans <sup>13, 14, 15</sup>. These specialized  
72 functions all involve the inferior parietal lobule (IPL), an area of the association  
73 cortex that represents a zone of topographical convergence in the brain <sup>15, 16</sup>.

74 Moreover, the IPL is one of the most expanded regions in humans compared with  
75 nonhuman primates <sup>1, 2, 6, 17</sup>. The functional diversity and expansion of the IPL imply  
76 that it contains subdivisions that may have been elaborated or developed in the  
77 ancestors of modern humans, allowing new abilities such as extensive tool use and  
78 communication using gestures <sup>17</sup>. However, due to the scarcity of data, different  
79 criteria, and methodological limitations for defining regions or subregions <sup>3</sup>, whether  
80 the internal organization of the IPL differs across species and whether this relates to  
81 different asymmetric functions remain unclear.

82 A major challenge for neuroscience is to translate results obtained using one method

83 and in one species to other methods and other species. Although the IPL has been  
84 subdivided into distinct subregions using cytoarchitecture and this technique has  
85 provided invaluable information, cellular microstructure alone is insufficient to  
86 completely represent brain organization, especially long-range connections, which are  
87 the major determinant of regional specialization<sup>18, 19</sup>. Furthermore, histological  
88 methods with postmortem brains cannot be readily scaled to large populations. Recent  
89 advances in diffusion magnetic resonance imaging (MRI), which allow the  
90 quantitative mapping of whole-brain neural connectivity in vivo, provide an  
91 alternative technique called connectivity-based parcellation to subdivide specific  
92 regions of the brain or even the entire cortex<sup>20, 21</sup>. In previous studies, this technique  
93 was successfully used to characterize the subdivisions in different species as well as  
94 to perform cross-species comparisons<sup>22, 23</sup>.

95 Previous studies have assessed asymmetries of the IPL using local characteristics,  
96 such as cortical volume, thickness, and surface area<sup>24, 25</sup>. However, although such  
97 regional asymmetries have been identified, additional analyses are needed to address the  
98 architecture of neural connectivity<sup>26</sup>. A recent “connectomic hypothesis for the  
99 hominization of the brain” suggests neural network organization as an intermediate  
100 anatomical and functional phenotype between the genome and cognitive capacities,  
101 which are extensively modified in the human brain<sup>27</sup>. Beyond that, the functions and  
102 interactions of brain regions are determined by their anatomical connections<sup>18</sup>.  
103 Therefore, identifying connectional asymmetries may provide new insights into the  
104 structural and functional specializations of the human brain.

105 This study investigated asymmetries of IPL subregions in terms of both structure and  
106 anatomical connectivity in macaques, chimpanzees, and humans. We first used  
107 connectivity-based parcellations to subdivide the IPL to reveal consistent  
108 cross-species topographical organization. We then investigated the volumetric  
109 allometric scaling and asymmetries of the IPL subregions across species. Using  
110 vertex-, region of interest (ROI)-, and tract-wise analyses, we examined asymmetries  
111 of the IPL subregions in terms of their connectivity profiles and subcortical white

112 matter pathways to identify evolutionary changes.

## 113 **Results**

### 114 **Connectivity-based parcellation**

115 For each species, a data-driven connectivity-based parcellation was applied to group  
116 the vertices in the IPL into functionally distinct clusters based on anatomical  
117 connectivity (**Fig. 1**). Because spectral clustering does not require a specific number  
118 of clusters, we iterated the number of subregions from two to twelve to search for the  
119 optimal number of subregions. To accomplish this, we identified the optimal number  
120 of subregions of the IPL by choosing the maximum number of subregions that showed  
121 a coherent topological organization across all species while balancing that by the  
122 minimum number of subregions that could be identified based on their  
123 cytoarchitectural definitions in macaques, chimpanzees, and humans<sup>28, 29</sup>. The two- to  
124 five-cluster solutions are shown in **Supplementary Fig. 1**. The two- to four-cluster  
125 solutions showed a consistent rostral-caudal pattern in all three species, but in the  
126 five-cluster solution a ventral cluster emerged in chimpanzees and a dorsal cluster  
127 emerged in humans. The four-cluster solution revealed a rostral-caudal topological  
128 pattern that was consistent with previous parcellations based on cytoarchitecture and  
129 anatomical connectivity<sup>19, 20, 23, 29</sup>. Also, the cytoarchitectural definition of macaques  
130 revealed four subregions in the IPL<sup>29</sup>, which was fewer than the seven  
131 cytoarchitectural subregions of the human IPL<sup>19</sup>. Although the four-cluster solution  
132 was not the finest, especially in humans, it contained potentially valuable information  
133 about the differences between species. Furthermore, the aim of our research was not  
134 to find the “best” cluster solution for the IPL but to identify an appropriate  
135 parcellation that could shed light on the lateralization of the structure and connectivity  
136 of the IPL and its subregions in this particular sample of three primate species. As  
137 such, we chose four clusters as the optimal solution for the cross-species comparison.  
138 It is widely accepted that the IPL contains two cytoarchitecturally distinct areas across

139 species, the anterior (PF) and posterior (PG) areas<sup>30, 31, 32</sup>. Our parcellation results  
140 were consistent with this two-way parcellation and refined it into four subdivisions,  
141 specifically, two anterior clusters (the C1 and C2) in the PF and two posterior clusters  
142 (the C3 and C4) in the PG. In macaques and chimpanzees, the IPL was previously  
143 parcellated into four distinct areas<sup>28, 29</sup> in keeping with our four-cluster solution. In  
144 humans, the IPL was cytoarchitecturally parcellated into seven distinct areas.  
145 Although we proposed a four-cluster solution that has fewer areas than the  
146 cytoarchitectural map, it is also consistent with it<sup>19</sup>. Specifically, the rostral anterior  
147 cluster (C1) is similar to the PFT and part of PFop area defined using cytoarchitecture  
148 by Caspers et al.<sup>19</sup>, the caudal anterior cluster (C2) corresponds to the PF and PFm  
149 areas, the rostral posterior cluster (C3) is similar to the PGa area, and the caudal  
150 posterior cluster (C4) is similar to the PGp area. Our results did not include the PFcm  
151 area because it is located deep in the parietal operculum. Given the limited  
152 descriptions of subdivisions and connectivity of the IPL in chimpanzees, our  
153 parcellation of the IPL can depict the subregions and connectivity of the IPL in  
154 chimpanzees from an evolutionary perspective.

155 To assess which hemisphere was dominant with respect to a given function of the  
156 human IPL subregions, we decoded the functions of the human IPL subregions from  
157 the Neurosynth database<sup>33</sup> and calculated differences in the correlation values between  
158 the left and right corresponding subregions (**Supplementary Fig. 2**). The term *tool*  
159 showed a much higher correlation with the left C1 than with the right C1, suggesting  
160 that the left C1 is more involved in tool use. Terms such as *tool* and *semantics* showed  
161 relatively high correlations with the left C2, whereas terms such as *nogo* and  
162 *inhibition* showed relatively high correlations with the right C2, suggesting that the  
163 left C2 is more involved in tool use and language whereas the right C2 is more  
164 involved in executive function. Terms such as *retrieval*, *episodic*, *recollection*,  
165 *memories*, and *coherent* showed relatively high correlations with the left C3, whereas  
166 terms such as *nogo*, *inhibition*, and *beliefs* were correlated with the right C3,  
167 suggesting that the left C3 is more involved in memory and language whereas the

168 right C3 is more involved in executive and social cognitive functions. Terms such as  
169 *episodic* and *coherent* showed relatively high correlations with the left C4, whereas  
170 terms such as *spatial*, *attention*, *mentalizing*, and *relevance* showed relatively high  
171 correlations with the right C4, suggesting that the left C4 could be more involved in  
172 memory and language whereas the right C4 could be more involved in spatial  
173 attention and social functions.  
174

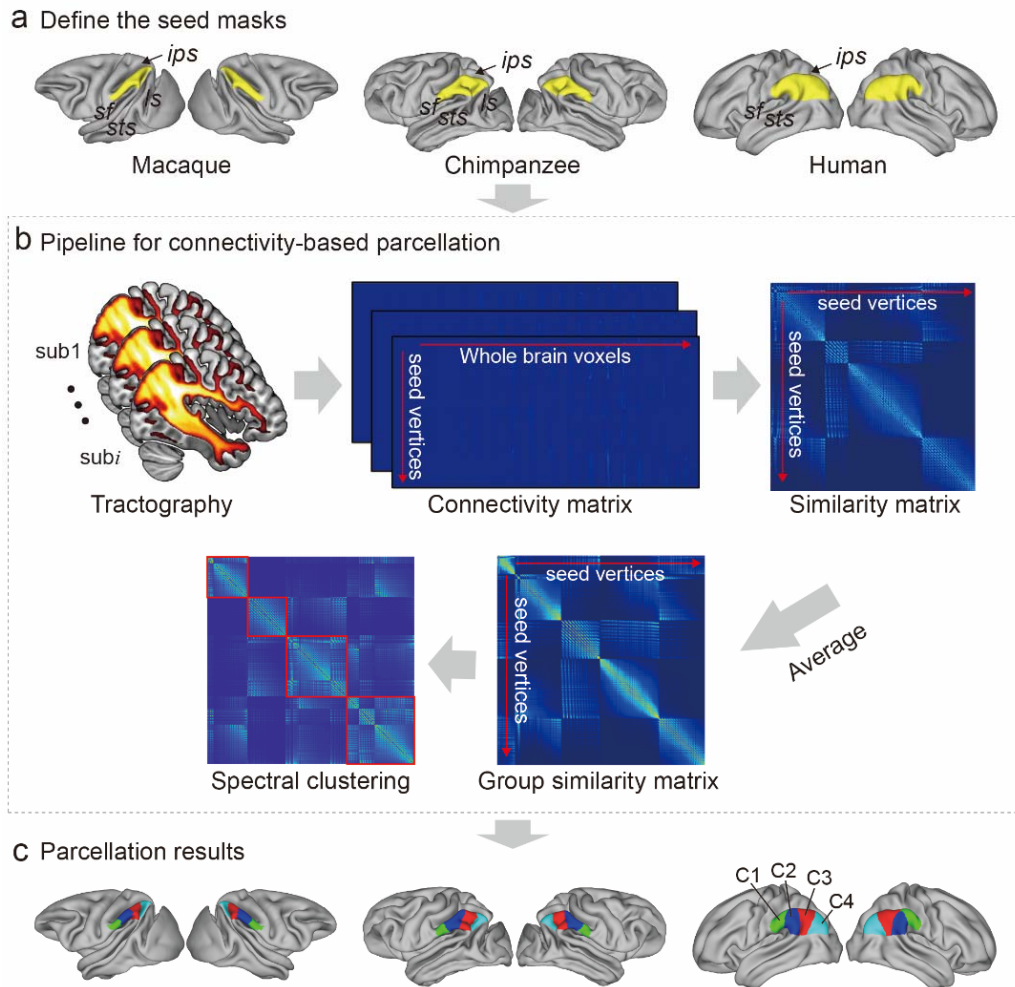

175  
176 **Figure 1.** Framework of the connectivity-based brain parcellation for macaques,  
177 chimpanzees, and humans. **(a)** Defining the seed masks of the inferior parietal lobule  
178 (IPL) in surface space according to the gyri and sulci. **(b)** Connectivity-based  
179 parcellation using anatomical connectivity. Probabilistic tractography was applied by  
180 sampling 5000 streamlines at each vertex within the seed mask. Whole-brain



181 connectivity profiles were used to generate a connectivity matrix with each row  
182 representing the connectivity profile of each seed vertex. Next, a correlation matrix  
183 was calculated as a measure of similarity between the seed vertices. Then, a group  
184 similarity matrix was calculated by averaging the correlation matrix across subjects  
185 and spectral clustering was applied to it. (c) Parcellation results of the IPL across  
186 species. The entire framework was applied independently for each hemisphere and  
187 each species.

188

### 189 **Allometric scaling and structural asymmetry of IPL subregions**

190 When examining the relationship between the volume of each of the IPL subregions  
191 and the total grey matter volume, the scaling of all the IPL subregions showed  
192 positive allometry (all slopes  $> 1$ ) (**Fig. 2a**). A statistical analysis revealed no  
193 significant relationships between the slopes of each pair of the bilateral IPL  
194 subregions. The asymmetry indices (AIs) for the IPL subregions were calculated and  
195 are shown in **Fig. 2b**. The macaques showed no significant asymmetry after  
196 Bonferroni correction for any of the subregions. The chimpanzees and humans  
197 showed a similar asymmetry pattern, that is, leftward asymmetry in the rostral IPL  
198 (the C1 and C2, all  $p < .001$ ) and rightward asymmetry in the caudal IPL (the C3 and  
199 C4, all  $p < .001$ ).

200

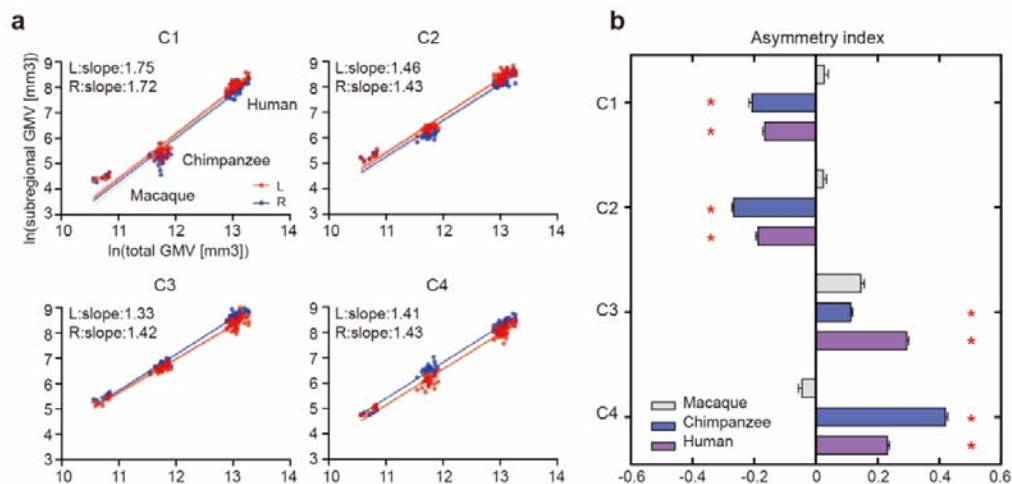

201

202 **Fig. 2.** Structural allometric scaling and asymmetries of the inferior parietal lobule  
203 (IPL) subregions across species. (a) Volumes of the IPL subregions plotted against  
204 total cortical gray matter volume (GMV). Solid lines represent the best fit using mean  
205 macaque, chimpanzee, and human data points; dotted lines represent 95% confidence  
206 intervals. (b) Volumetric asymmetries of the IPL subregions. Negative asymmetry  
207 index indicates leftward asymmetry and positive index indicates rightward asymmetry.  
208 \* denotes significance at the Bonferroni corrected level of  $p < .05$ . The error bar  
209 indicates the standard error of the mean.

## 210 **Connectional asymmetries of IPL subregions**

211 To investigate the connectional asymmetries of the IPL subregions, we first calculated  
212 the connectivity profiles of the left and right subregions in macaques, chimpanzees,  
213 and humans using probabilistic tracking (**Supplementary Fig. 3**). Visualization of the  
214 connectivity patterns of the IPL did not show significant interhemispheric asymmetry  
215 in monkeys or chimpanzees but did in humans, especially in connections with the  
216 inferior frontal gyrus (IFG) and lateral temporal cortex. A vertex-wise analysis was  
217 then performed to examine the connectional asymmetry of each subregion for each  
218 species by calculating the AIs between its connectivity profiles for the two  
219 hemispheres (**Fig. 3**). Additionally, ROI- and tract-wise analyses were used to  
220 examine the asymmetry of cortical regions and subcortical white matter pathways

221 connected to the subregions, respectively (**Fig. 4**). No significant asymmetries were  
222 found in macaques in any of the statistical analyses after correction for multiple  
223 comparisons.

224 In chimpanzees, the C1 showed significant leftward asymmetry mainly in connections  
225 with the anterior middle frontal gyrus (MFG), anterior IFG, planum temporale, and  
226 insula. The C2 showed significant leftward asymmetric connections with the insula  
227 and rightward asymmetric connections with the superior parietal lobule (SPL) and  
228 superior longitudinal fasciculus 2 (SLF2). The C3 showed significant leftward  
229 asymmetric connections with the anterior superior temporal gyrus (STG), anterior  
230 superior temporal sulcus (aSTS), and occipitotemporal area and rightward asymmetric  
231 connections with the SPL and posterior cingulate gyrus (PCC). The C4 showed  
232 significant leftward asymmetric connections with the anterior STG (aSTG) and  
233 rightward asymmetry with the SPL and PCC.

234 In humans, the C1 showed significant leftward asymmetric connections with the  
235 ventral premotor and motor cortices and insula, which was consistent with regional  
236 leftward asymmetric connections with the precentral gyrus (PreG) and insula. The C1  
237 also showed significant leftward asymmetric connections with the posterior MFG,  
238 aSTG, and posterior middle temporal gyrus (MTG) and rightward asymmetric  
239 connections with the orbital part of the IFG, posterior STS, and dorsal precuneus. The  
240 C2 showed significant leftward asymmetric connections with the posterior MFG,  
241 ventral premotor and motor cortices, SPL, anterior temporal lobe, and posterior MTG,  
242 which was consistent with regional leftward asymmetric connections with the IFG,  
243 PreG, postcentral gyrus (PostG), SPL, and STG and was supported by leftward  
244 asymmetric subcortical connections with the SLF2, SLF3, and arcuate fasciculus (AF).  
245 The C2 also showed rightward asymmetric connections with the orbital part of the  
246 IFG and posterior cingulate sulcus. The C3 showed significant leftward asymmetry  
247 mainly in the connections with the anterior IFG, SPL, and almost all the lateral  
248 temporal cortex, which was consistent with regional leftward asymmetric connections  
249 with the MTG and inferior temporal gyrus (MTG/ITG). The C3 also showed

250 rightward asymmetric connections with the IFG, which was supported by leftward  
 251 asymmetric subcortical connections with the SLF3. The C4 showed significant  
 252 leftward asymmetry mainly in the connections with the IFG and anterior and posterior  
 253 temporal cortex. The C4 also showed significant regional leftward asymmetric  
 254 connections with the PreG, PostG, and SPL in the ROI-wise analysis.  
 255

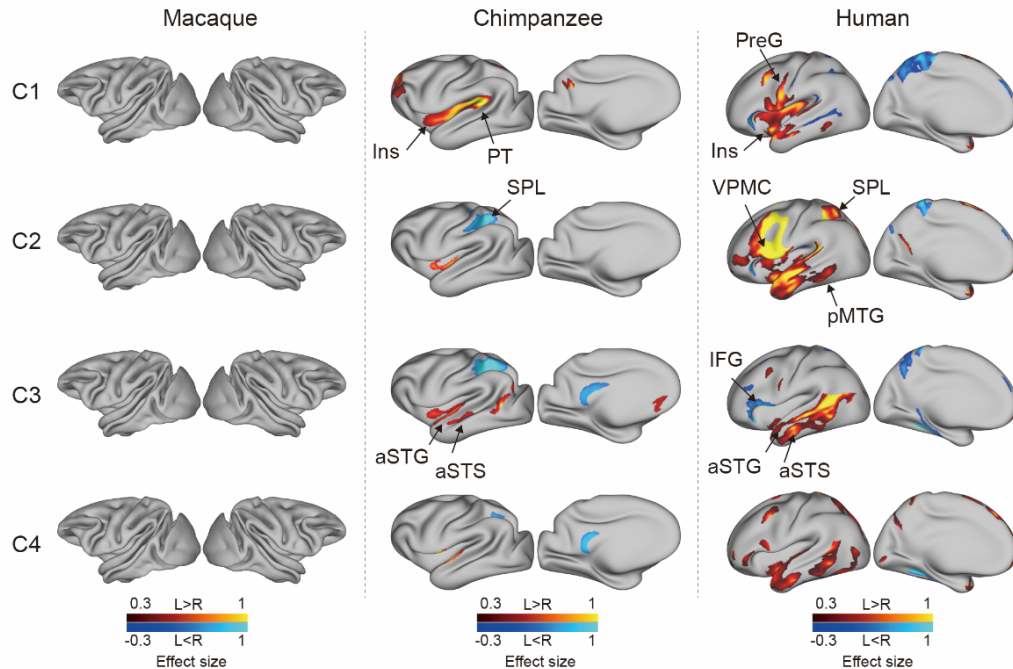

256  
 257 **Fig. 3.** Connective asymmetries of the IPL subdivisions in the vertex-wise analysis  
 258 across species. Effect size (Cohen's *d*) related to asymmetric connections of IPL  
 259 subdivisions displayed on the left hemisphere of a species-specific standard brain  
 260 (leftward asymmetry: yellow, rightward asymmetry: blue) for each species for areas  
 261 showing a significance at the level of  $p < .05$  corrected for multiple comparisons  
 262 using false discovery rate correction. PreG, precentral gyrus; SPL, superior parietal  
 263 lobule; aSTG, anterior superior temporal gyrus; aSTS, anterior superior temporal sulci;  
 264 PT, planum temporale; VPMC, ventral premotor cortex; pMTG, posterior middle  
 265 temporal gyrus; IFG, inferior frontal gyrus; Ins, insula.  
 266  
 267

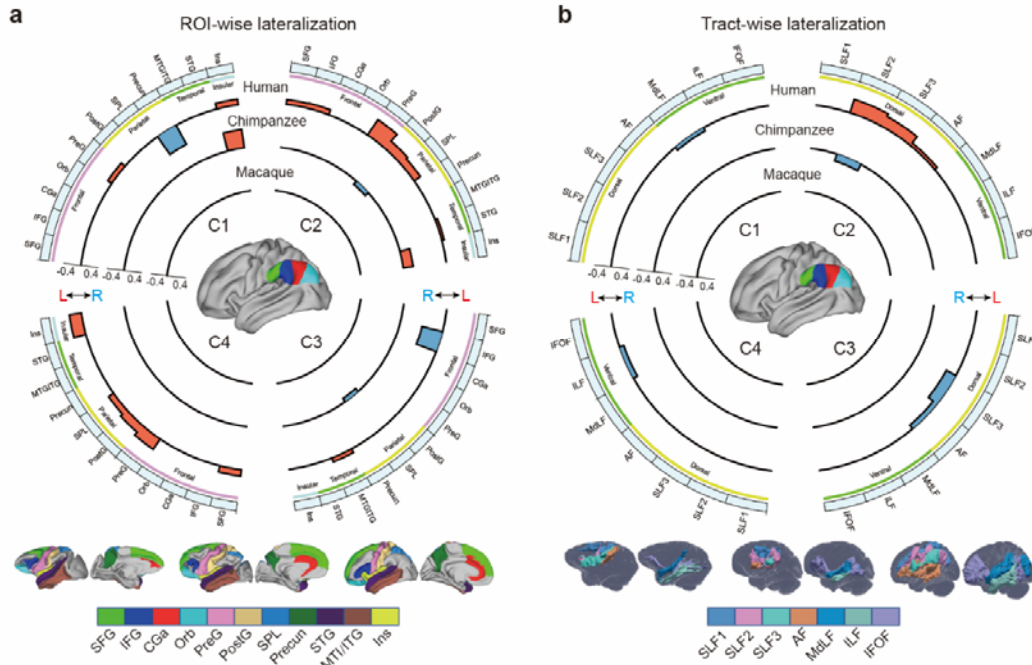

268

269 **Fig. 4.** (a) Connective asymmetries of IPL subdivisions in the region of interest  
 270 (ROI)-wise analysis across species. Connective asymmetry was calculated for the  
 271 connections between each IPL subregion and eleven ROIs. (b) Connective  
 272 asymmetries of the IPL subdivisions in the tract-wise analysis across species.  
 273 Connective asymmetry was calculated for the connections between each IPL  
 274 subregion and the seven tracts. For all plots, the four quadrants of each circle  
 275 correspond to the four IPL subregions. The outermost circles represent ROIs or tracts.  
 276 The three inner circles from inside to outside represent macaques, chimpanzees, and  
 277 humans, respectively. For all plots, only the connectivity showing a significance at a  
 278 Bonferroni corrected level of  $p < .05$  are displayed. SFG, superior frontal gyrus; IFG,  
 279 inferior frontal gyrus; CGa, anterior cingulate gyrus; Orb, orbitofrontal cortex; PreG,  
 280 precentral gyrus; PostG, postcentral gyrus; SPL, superior parietal lobule; STG,  
 281 superior temporal gyrus; MTG/ITG, middle temporal gyrus and inferior temporal  
 282 gyrus; Ins, insula; SLF1, SLF2, SLF3, the three branches of the superior longitudinal  
 283 fasciculus; AF, arcuate fasciculus; MdLF, middle longitudinal fasciculus; ILF, inferior  
 284 longitudinal fasciculus; IFOF, inferior fronto-occipital fasciculus.

285

## 286 **Discussion**

287 In the present study, we investigated asymmetries of the IPL in the structure and  
288 connectivity of macaques, chimpanzees, and humans. In the structural analysis, the  
289 IPL and its subregions exhibited a similar pattern of positive allometric scaling  
290 between hemispheres for all species. In addition, the chimpanzees and humans shared  
291 similar asymmetric patterns in the IPL subregions, i.e., left asymmetry in the anterior  
292 part and right asymmetry in the posterior part, whereas macaques did not display  
293 asymmetry. In the connectivity analysis, the chimpanzees showed some connectional  
294 asymmetric regions including the SPL, insula, planum temporale, aSTG, and aSTS.  
295 The humans showed widespread connectional asymmetric regions including the  
296 primary motor and premotor cortices, SPL, insula, and the entire lateral temporal lobe.  
297 These regions are associated with language, tool use, and handedness, suggesting a  
298 potential relationship between the connectional asymmetry and the functional  
299 hemispheric specialization of the human brain.

### 300 **Positive allometric scaling and structural asymmetry of IPL subregions**

301 Brain allometry describes the quantitative scaling relationship between changes in the  
302 size of one structure relative another structure, often the whole brain or cerebral  
303 cortex<sup>3, 34</sup>. Previous allometric studies suggested that the association cortex  
304 (prefrontal, temporal, and parietal regions) scales with positive allometry (i.e.,  
305 increases in size disproportionately, or more rapidly) across primates<sup>3, 35</sup>. Utilizing  
306 parcellation-based delineations, a recent study provided evidence that human brains  
307 have a greater proportion of prefrontal cortex gray matter volume than other primates  
308<sup>7</sup> and other studies demonstrate that human prefrontal expansion is greater than would  
309 be expected from allometric scaling in nonhuman primates<sup>34, 35</sup>, although there  
310 remains some conflicting analyses<sup>36</sup>. In the present study, we used macro-anatomical  
311 boundaries to identify the boundaries of the IPL and a connectivity-based parcellation  
312 approach to subdivide the IPL, which helped to reveal its internal organization. We

313 found that the bilateral IPL subregions exhibited consistent, positive allometric  
314 scaling, which suggests that allometric scaling of the internal organization of the IPL  
315 was similar and was also consistent between homotopic regions during the evolution  
316 of the IPL in anthropoid primates. With only three species in the sample, our dataset  
317 does not allow us to use phylogenetic comparative statistical methods or determine  
318 whether human IPL subregions fall significantly above allometric expectations from  
319 nonhuman primates; future research that incorporates a broad phylogenetic sample of  
320 diverse primate brains would be necessary.

321 We found that chimpanzees and humans showed a similar dichotomous asymmetric  
322 pattern in their IPL subregions, i.e., leftward asymmetry in the anterior portion (the  
323 C1 and C2) and rightward asymmetry in the posterior portion (the C3 and C4). The  
324 result in humans is consistent with a recent study using data from a large consortium  
325 showing leftward asymmetry in the supramarginal gyrus and rightward asymmetry in  
326 the angular gyrus in terms of surface area<sup>24</sup>. The divergent volumetric asymmetries  
327 suggest functional heterogeneities of the IPL and emphasize the importance of  
328 analyzing subregions within the IPL. The shared asymmetric pattern also suggests that  
329 divergences in the internal organization of the IPL evolved prior to the common  
330 ancestor of chimpanzees and humans.

### 331 **Connectional asymmetries underlying human language and complex tool use**

332 Recent neuroimaging studies have highlighted specific brain regions and pathways  
333 that may be necessary for tool use<sup>13, 37</sup>. We found that humans showed leftward  
334 asymmetric connectivity between the IPL (the C2) and the primary motor cortex,  
335 ventral premotor cortex, SPL, and posterior MTG, all of which were activated in tasks  
336 related to tool use and might constitute a cortical network underlying complex tool  
337 use<sup>13</sup>. In addition, portions of this network appeared to represent part of a system that  
338 is tightly linked with language systems. The interaction between the tool use system  
339 and the language system, though with a clear left hemisphere bias, is responsible for  
340 representing semantic knowledge about familiar tools and their uses and for acquiring



341 the skills necessary to perform these actions <sup>3, 13, 16, 37</sup>. Several theories suggest that the  
342 evolutionary path leading to language and tool use in humans may largely be based on  
343 the ability to gesture and imitate, which is partially founded on a “mirror neuron”  
344 system <sup>13</sup>. Macaques are thought to emulate the goals and intentions of others,  
345 whereas chimpanzees can also imitate certain specific actions, but humans have an  
346 even stronger bias for high-fidelity copying of precise sequences of actions, which has  
347 been called “overimitation” <sup>38</sup>. Our findings provide a potential explanation for these  
348 phenomena in that the macaques showed no asymmetric network connections, the  
349 chimpanzees showed a few asymmetric connections, but the humans showed a large  
350 number of asymmetric connections. These species differences in leftward asymmetric  
351 connections involving language and tool use may reflect human specializations for  
352 language and complex tool use.

353 Unlike the humans, who showed considerable leftward asymmetry connectivity  
354 between the IPL and the lateral temporal cortex, the chimpanzees showed few  
355 leftward asymmetric connections between the IPL and the temporal cortex, including  
356 the planum temporale, aSTG, and aSTS. The planum temporale is considered to  
357 include part of Wernicke’s area homolog <sup>11</sup>, and displays leftward anatomical  
358 asymmetry in humans and great apes <sup>39, 40</sup>. Our result of increased asymmetric  
359 connections between the IPL and planum temporale in human brains compared to  
360 chimpanzees and macaques reinforces the evidence that the evolutionary origin of  
361 human language capacities are related to further left hemispheric specialization of  
362 neural substrates for auditory processing that are shared with other primates <sup>41</sup>. Since  
363 the aSTG and aSTS have been implicated in semantic and phonologic processing in  
364 humans <sup>42</sup>, the leftward asymmetric connections of IPL with the aSTG and aSTS may  
365 be relevant to the evolution of human language processing.

### 366 **Species-specific differences in asymmetric connectivity in chimpanzees and** 367 **humans**

368 Species-specific differences in asymmetric connectivity between the IPL and SPL



369 were found in chimpanzees and humans, with leftward asymmetry in the former and  
370 rightward asymmetry in the latter. These species differences in hemispheric  
371 asymmetry may reflect evolutionary changes responsible for adaptations or the  
372 production of new abilities in the human brain. Structurally, in chimpanzees, right  
373 anatomical asymmetry in the white matter below the SPL<sup>43</sup> may increase the right  
374 connectivity between the IPL and SPL compared with the left side. In humans, the  
375 leftward volumetric asymmetry in the SPL<sup>44</sup>, together with leftward volumetric  
376 asymmetry in the IPL (the C2), may support the leftward asymmetric connectivity.  
377 Functionally, interaction between the IPL and SPL is crucial for tool use, which is  
378 dominant in the left hemisphere, and visuospatial function, which is dominant in  
379 the right<sup>13, 45, 46</sup>. As for tool use, in contrast to the relatively simple tools used by  
380 chimpanzees and other species, humans can create complex artifacts through a  
381 sequence of actions that may incorporate multiple parts, reflecting a deep  
382 understanding of the physics of our bodies, surrounding objects, and the unique  
383 demands of the external environments in which we live<sup>16, 47</sup>. In addition, complex  
384 tool use requires the SPL to code the location of the limbs relative to other body parts  
385 during planning and executing tool-use movements or hand gestures<sup>13, 14, 48</sup>. Leftward  
386 asymmetric connectivity between the IPL and SPL may have provided a connectional  
387 substrate for complex tool use during human evolution. As for visuospatial functions,  
388 the rightward asymmetric connectivity between the IPL and SPL in chimpanzees may  
389 indicate that visuospatial functions are dominant in the right hemisphere and had  
390 already been lateralized to the right hemisphere. During evolution, these lateralized  
391 functions may be retained in the human brain. Meanwhile, the lateralized directional  
392 reversal of this connectivity from the right to the left hemisphere may reflect  
393 evolutionary adaptations for the emergence of new abilities, such as sophisticated and  
394 complex tool making and use.

### 395 **Human unique asymmetric connectivity of IPL subregions**

396 Unlike the chimpanzees, humans showed leftward asymmetry in the connection

397 between the rostral IPL (the C1 and C2) and the primary motor cortex, which is  
398 consistent with a larger neuropil volume in the left primary motor cortex than in the  
399 right side<sup>49</sup>. Meanwhile, the leftward asymmetric volume of the anterior IPL and the  
400 primary motor cortex may also increase the neural connectivity between these two  
401 regions in the left hemisphere compared with the right side. Such a leftward  
402 connection is thought to be related to handedness and hand manual skills<sup>49, 50</sup>. In  
403 contrast to humans, chimpanzees and macaques did not show any asymmetric  
404 connectivity between the IPL and the primary motor cortex. Although previous  
405 studies have shown that chimpanzees exhibit population-level handedness in the use  
406 of tools and a corresponding asymmetry in the primary motor cortex, inferior frontal  
407 cortex, and parietal operculum<sup>51,52</sup>, they do not show handedness as a more universal  
408 trait or exhibit manual dexterity to the same extent as humans. One possible  
409 explanation is that humans developed the asymmetric connectivity that became the  
410 structural basis for specific behaviors of handedness and hand skills during evolution.  
411 An unexpected finding was that in humans the IPL, particularly the C3, showed  
412 rightward asymmetric connection with the IFG. Since the IPL and the IFG are  
413 interconnected through the SLF3, which is strongly rightward asymmetric<sup>46</sup>, it may  
414 also increase the connection between the IPL and IFG in the right hemisphere.  
415 Functionally, the left IFG is involved in various aspects of language functions,  
416 including speech production and semantic, syntactic, and phonological processing<sup>22</sup>,  
417 while the right IFG is associated with various cognitive functions, including attention,  
418 motor inhibition, and social cognitive processes<sup>53</sup>. Our result of rightward asymmetry  
419 in this connection seems to be associated with attention and social function, but not  
420 language, although language dominance in the left hemisphere is considered to be a  
421 common characteristic in humans.

422

423 The widespread asymmetric connections of the IPL in humans compared with the  
424 other two primates is in keeping with the inter-hemispheric independence hypothesis,  
425 in which, during evolution, brain size expansion led to hemispheric specialization due

426 to decreased inter-hemispheric connectivity, resulting in increased intra-hemispheric  
427 connectivity<sup>54, 55</sup>. While having more cortical neurons (local characteristics) in one  
428 hemisphere than the other seems to be a necessary condition for asymmetries of  
429 complex and flexible behaviors, it is not a full condition for such behaviors. Given  
430 that a function or behavior in an area is determined by its connectivity or networks in  
431 which it is involved<sup>18</sup>, the widespread lateralized connections may provide the human  
432 brain with the increased computational capacity necessary for processing language  
433 and complex tool use and may play a facilitating role in human specialization.

434

435 In conclusion, we identified similar topographical maps of the IPL to study the  
436 structural and connectional asymmetry in macaques, chimpanzees, and humans. The  
437 structural analysis revealed that the structural asymmetry of the IPL was independent  
438 of the allometric scaling of this region. The connectional analysis revealed that  
439 humans had the largest connectional asymmetries of IPL subregions compared to  
440 macaques and chimpanzees. The regions showing larger asymmetric connections with  
441 the human IPL were associated with language, complex tool use, and handedness,  
442 which provided potential anatomical substrates for functional and behavioral  
443 asymmetries in humans. The opposite asymmetric connection between the IPL and  
444 SPL in chimpanzees and humans may reflect evolutionary adaptation during the  
445 course of the human evolution.

446

## 447 **Methods**

### 448 **Human data**

449 Data from 40 right-handed healthy adults (age: 22–35, 14 males) were randomly  
450 selected from the S500 subjects release of the Human Connectome Project (HCP)  
451 database<sup>56</sup> (<http://www.humanconnectome.org/study/hcp-young-adult/>). T1-weighted  
452 (T1w) MPRAGE images (resolution: 0.7mm isotropic, slices: 256; field of view: 224

453  $\times 320$ ; flip angle:  $8^\circ$ ), and diffusion-weighted images (DWI) (resolution: 1.25mm  
454 isotropic; slices: 111; field of view:  $210 \times 180$ ; flip angle:  $78^\circ$ ; b-values: 1000, 2000,  
455 and  $3000 \text{ s/mm}^2$ ) were collected on a 3 T Skyra scanner (Siemens, Erlangen, Germany)  
456 using a 32-channel head coil.

#### 457 **Chimpanzee data**

458 Data from 27 adult chimpanzees (*Pan troglodytes*, 14 males) were made available by  
459 the National Chimpanzee Brain Resource (<http://www.chimpanzeebrain.org>,  
460 supported by the NIH National Institute of Neurological Disorders and Stroke). Data,  
461 including T1w and DWI, were acquired at the Yerkes National Primate Research  
462 Center (YNPC) on a 3T MRI scanner under propofol anesthesia (10 mg/kg/h) using  
463 previously described procedures<sup>57</sup>. All procedures were carried out in accordance  
464 with protocols approved by YNPRC and the Emory University Institutional Animal  
465 Care and Use Committee (Approval no. YER-2001206).

466 DWI were acquired using a single-shot spin-echo echo-planar sequence for each of 60  
467 diffusion directions ( $b = 1000 \text{ s/mm}^2$ , repetition time 5900 ms; echo time 86 ms; 41  
468 slices; 1.8 mm isotropic resolution). DWI with phase-encoding directions (left–right)  
469 of opposite polarity were acquired to correct for susceptibility distortion. For each  
470 repeat of a set of DWI, five  $b = 0 \text{ s/mm}^2$  images were also acquired with matching  
471 imaging parameters. T1w images were also acquired for each subject (218 slices,  
472 resolution:  $0.7 \times 0.7 \times 1 \text{ mm}$ ).

#### 473 **Macaque data**

474 Data from 8 male adult macaque monkeys (*Macaca mulatta*) were obtained from  
475 TheVirtualBrain<sup>58</sup>. All surgical and experimental procedures were approved by the  
476 Animal Use Subcommittee of the University of Western Ontario Council on Animal  
477 Care and followed the Canadian Council of Animal Care guidelines. Surgical  
478 preparation and anesthesia as well as imaging acquisition protocols have been  
479 previously described<sup>58</sup>. Images were acquired using a 7-T Siemens MAGNETOM

480 head scanner. Two diffusion-weighted scans were acquired for each animal, with each  
481 scan having opposite phase encoding in the superior-inferior direction at 1 mm  
482 isotropic resolution, allowing for correction of susceptibility-related distortion. For  
483 five animals, the data were acquired with 2D EPI diffusion, while for the remaining  
484 three animals, a multiband EPI diffusion sequence was used. In all cases, data were  
485 acquired with  $b_{\text{max}} = 1000 \text{ s/mm}^2$ , 64 directions, 24 slices. Finally, a 3D T1w image  
486 was also collected for each animal (128 slices, resolution: 0.5 mm isotropic).

### 487 **Image preprocessing**

488 The human T1w structural data had been preprocessed following the HCP's minimal  
489 preprocessing pipeline<sup>59</sup>, while the chimpanzee and monkey T1w structural data had  
490 been preprocessed following the HCP's nonhuman preprocessing pipelines described  
491 in previous studies<sup>7,59</sup>. Briefly, the processing pipeline included imaging alignment to  
492 standard volume space using FSL, automatic anatomical surface reconstruction using  
493 FreeSurfer, and registration to a group average surface template space using the  
494 Multimodal Surface Matching (MSM) algorithm<sup>60</sup>. Human volume data were  
495 registered to Montreal Neurological Institute (MNI) standard space and surface data  
496 were transformed into surface template space (fs\_LR). Chimpanzee volume and  
497 surface data were registered to the Yerkes29 chimpanzee template<sup>7</sup>. Macaque volume  
498 and surface data were registered to the Yerkes19 macaque template<sup>7</sup>.

499 Preprocessing of the diffusion-weighted images was performed in a similar way in the  
500 human, chimpanzee, and macaque datasets using FSL. FSL's DTIFIT was used to fit a  
501 diffusion tensor model for each of the three datasets. Following preprocessing,  
502 voxel-wise estimates of the fiber orientation distribution were calculated using  
503 Bedpostx, allowing for three fiber orientations for the human dataset and two fiber  
504 orientations for the chimpanzee and macaque datasets due to the b-value in the  
505 diffusion data.

## 506 **Definition of the IPL**

507 The IPL, located at the lateral surface of the ventral posterior parietal lobe, is  
508 surrounded by several sulci including the Sylvian fissure, superior temporal sulcus  
509 (STS), and intraparietal sulcus (IPS)<sup>29,30,31,32</sup>. In the absence of detailed homologous  
510 definitions, it is necessary to use cytoarchitectonic delineations and macroscopic  
511 boundaries, such as gyri and sulci, that can be reliably identified in all species as the  
512 boundaries of the IPL. The region of interest (ROI) of the IPL was manually drawn on  
513 the standard surface template using Connectome Workbench<sup>59</sup>. In the present study,  
514 we restricted the ROI to the lateral surface of the IPL and excluded the cortex buried  
515 in the sulci, especially the lateral bank of the IPS and the upper bank of the Sylvian  
516 fissure. Rostrally, the IPL borders the vertical line between the Sylvian fissure and the  
517 rostral lip of the IPS. Dorsally, the IPL borders the lateral bank of the IPS. Ventrally,  
518 the anterior ventral IPL borders the upper bank of the Sylvian fissure. The border of  
519 the posterior and ventral IPL is formed by the extension of the Sylvian fissure to the  
520 top end of the STS in chimpanzees and macaques but by the extension of the Sylvian  
521 fissure to the posterior end of the IPS in humans.

## 522 **Connectivity-based parcellation**

523 We used a data-driven connectivity-based parcellation framework modified from Fan  
524 *et al*<sup>20</sup> (**Figure 1**). All steps in the framework were processed on surface data because  
525 the surface-based method has advantages, such as cortical areal localization<sup>61</sup>, over  
526 the traditional approach and because the use of surface meshes is a straightforward  
527 way to improve existing tractography processing pipelines, such as the precise  
528 locations of streamline seeding and termination<sup>62</sup>. The surface ROI was first  
529 registered to native surface using MSM<sup>60</sup>. The probabilistic tractography was  
530 performed on the native mesh representing the gray/white matter interface using  
531 Probtrackx. The pial surfaces were used as stop masks to prevent streamlines from  
532 crossing sulci. 5000 streamlines were seeded from each of the white matter surface  
533 vertices in the seed region to estimate its whole-brain connectivity profile and were

534 downsampled to 5 mm isotropic voxels to construct the native connectivity M-by-N, a  
535 matrix between all the IPL vertices (M) and the brain voxels (N). Based on the native  
536 connectivity matrix, a symmetric cross-correlation M-by-M matrix was calculated to  
537 quantify the similarity between the connectivity profiles of each IPL vertex. A group  
538 cross-correlation matrix was calculated by averaging the cross-correlation matrix  
539 across subjects.

540 Data-driven spectral clustering was applied to the group cross-correlation matrix to  
541 define the anatomical boundaries of the IPL. Spectral clustering can capture clusters  
542 that have complicated shapes, making them suitable for parcellating the structure of  
543 complicated brain regions such as the IPL. In addition, the spectral clustering  
544 algorithm was successfully used to establish the Brainnetome Atlas <sup>20</sup>. However, the  
545 number of clusters must be defined by the experimenter when using this method. In  
546 the current study, we explored from two to twelve parcellations.

#### 547 **Volumetric analysis of the IPL**

548 The cortical gray matter volumetric measurements were calculated using Freesurfer.  
549 Total cortical volumes were determined by the space between the white and pial  
550 surfaces in native space. Each subregion drawn on standard surface space was  
551 registered to native surface space using an existing mapping between the two meshes.  
552 The volume of the IPL and its subregions was determined by averaging all the  
553 vertices for each subject.

#### 554 **Functional decoding of each subregion of the human IPL**

555 Each subregion was first mapped to MNI volume space using a ribbon-constrained  
556 method in Connectome Workbench. To decode the functions of each subregion, we  
557 used the automated meta-analysis database, Neurosynth <sup>33</sup> to identify the terms that  
558 were the most associated with each subregion. The top five non-anatomical terms  
559 with the highest correlation values were kept for all subregions and redundant terms,  
560 such as ‘*semantic*’ and ‘*semantics*’, were only considered once. For simplicity, we

561 only showed the positive correlations found by decoding because negative  
562 correlations do not directly inform us about the functions of the subregions. The  
563 lateralization for each term was obtained by calculating the difference in the  
564 correlation values of the subregions between the left and right hemispheres.

### 565 **Mapping anatomical connectivity profiles**

566 To map the whole-brain anatomical connectivity pattern for each cluster, we  
567 performed probabilistic tractography by drawing 5000 samples from each vertex in  
568 each cluster. The resulting tractograms were log-transformed, normalized by the  
569 maximum, and then projected onto surface space using ‘surf\_proj’ command in FSL  
570 to obtain tractograms in surface space. The surface tractograms were smoothed using  
571 a 4 mm kernel for humans, 3 mm kernel for chimpanzees, and 2 mm kernel for  
572 macaques. We subsequently averaged the surface tractograms across subjects for the  
573 left and right hemispheres separately to obtain population tractograms, which were  
574 thresholded by a value of 0.5 for humans, 0.2 for chimpanzees, and 0.3 for macaques  
575 due to data quality. The resultant population tractograms represented approximately  
576 twenty percent of the non-zero vertexes in the non-thresholded population tractograms  
577 and were used for the vertex-wise and ROI-wise comparisons. The volumetric  
578 tractograms were used for the tract-wise comparison.

### 579 **Vertex-wise analysis**

580 For each subregion, we restricted the analysis to the group mask defined by the  
581 combination of the left and mirrored right population tractograms described above.  
582 We here used the connectivity probabilistic value to quantify the connectivity between  
583 the IPL and each vertex of the rest of the brain. A higher value in the vertex means a  
584 higher likelihood of being connected to the IPL than other vertexes.

### 585 **ROI-wise analysis**

586 Although previous studies have devoted much effort to establishing homologous



587 regions in primates, these are still limited to a few regions, particularly in  
588 chimpanzees. To make comparisons across species possible, here we used the  
589 common principle of macroscopic anatomical boundaries based on the gyri and sulci  
590 to define ROIs in the cerebral cortex. Specifically, the Desikan–Killiany–Tourville  
591 (DKT) atlas was used for humans<sup>63</sup>, a modified DKT atlas for the chimpanzees, and  
592 the Neuomaps atlas for the macaques<sup>64</sup>. Because the Neuomaps atlas is volumetric,  
593 we first mapped it to surface space for the subsequent calculations. A total of eleven  
594 cortical ROIs were chosen for each hemisphere: the superior frontal gyrus (SFG),  
595 inferior frontal gyrus (IFG, a combination of the pars triangularis and pars opercularis  
596 in humans and chimpanzees), anterior cingulate gyrus (CGa, a combination of the  
597 rostral and caudal anterior-cingulate in humans and chimpanzees), orbitofrontal cortex  
598 (Orb), precentral gyrus (PreG), postcentral gyrus (PostG), superior parietal lobule  
599 (SPL), precuneus, superior temporal gyrus (STG), middle temporal gyrus and inferior  
600 temporal gyrus (MTG/ITG), and insula. The MTG/ITG was a combination of the  
601 MTG and ITG in humans and chimpanzees due to the absence of the MTG in  
602 macaques. The connectional value of each ROI was calculated by averaging all  
603 vertices in the ROI on the individual surface tractogram for each subregion.

#### 604 **Tract-wise analysis**

605 To investigate which subcortical fiber tracts are associated with lateralization of  
606 cortical areas connected to the IPL, we analyzed the lateralization of the subcortical  
607 white matter tracts connected to the IPL across species. A total of seven tracts were  
608 chosen: the three branches of the superior longitudinal fasciculus, arcuate fasciculus,  
609 middle longitudinal fasciculus, inferior longitudinal fasciculus, inferior  
610 fronto-occipital fasciculus. The automated tractographic protocols for tracts for each  
611 species were from previous studies<sup>65</sup> and these tracts were reconstructed using the  
612 Xtract tool<sup>66</sup>. The mean value of each tract was calculated by averaging all voxels in  
613 the tract in the individual volumetric tractogram for each subregion.

## 614 **Statistical analysis**

615 To investigate the allometric relationship between the volume of each of the IPL  
616 subregions and the total gray matter volume using log-transformed data <sup>7</sup>, linear  
617 regression was performed by pooling the human, chimpanzee, and macaque data for  
618 each of the IPL subregions, separately. To test whether the scaling regression slopes  
619 differed significantly between the two hemispheres, we performed an ANCOVA for  
620 comparisons across the two regression slopes for each plot.

621 In all the analyses of the structural and connectional asymmetries (i.e., volumetric,  
622 vertex-wise, ROI-wise, and tract-wise), the asymmetry index (AI) was defined as the  
623 difference between values for the left and right hemispheres according to the formula  
624  $AI = 2*(R-L)/(R+L)$ . For the vertex-wise analysis, a one-sample *t* test was performed  
625 at each vertex on the group mask for each species using PALM, with 5000  
626 permutations with a sign-flip strategy <sup>67</sup>. The statistically significant level was set at  
627 false discovery rate corrected  $p < .05$ . The effect sizes (Cohen's *d*) were displayed on  
628 the average surface. For the volumetric, ROI-wise, and tract-wise analysis, a  
629 two-sided Wilcoxon signed-rank test was performed for each subregion. Bonferroni  
630 correction was then used for multiple comparisons for seeds, ROIs or tracts, and  
631 species, with statistical significance set at  $p < .05$ .

632

## 633 **Acknowledgments**

634 This work was partially supported by the National Natural Science Foundation of  
635 China (Grant Nos. 91432302, 82072099, 31620103905, and 81671855), the Science  
636 Frontier Program of the Chinese Academy of Sciences (Grant No.  
637 QYZDJ-SSW-SMC019), National Key R&D Program of China (Grant No.  
638 2017YFA0105203), Beijing Municipal Science & Technology Commission (Grant  
639 Nos. Z161100000216152, Z161100000216139, Z171100000117002), the Guangdong  
640 Pearl River Talents Plan (2016ZT06S220), Key-Area Research and Development

641 Program of Guangdong Province (2018B030333001), the Youth Innovation  
642 Promotion Association, and the Beijing Advanced Discipline Fund. The National  
643 Chimpanzee Brain Resource was supported by NIH - National Institute of  
644 Neurological Disorders and Stroke (NIH Grant No. NS092988). We thank Rhoda E.  
645 and Edmund F. Perozzi, PhDs, for English language and editing assistance.

646 **Author contributions**

647 T.J. and L.F. designed the study. L.C. and G.L. analyzed the data. W.D.H. and C.C.S  
648 collected the data. L.C. wrote the first draft of the manuscript. T.J. supervised the  
649 study. All authors revised and approved the manuscript.

650 **Data availability**

651 The datasets analyzed during the current study are available at <https://www.humanconnectome.org>,  
652 <http://www.chimpanzeebrain.org>,  
653 <http://openneuro.org/datasets/ds001875/versions/1.0.3>, and  
654 <http://www.neurosynth.org>.

655 **Competing interests**

656 The authors declare no competing interests.

657

658

659 **References**

- 660 1. Ardesch DJ, Scholtens LH, Li L, Preuss TM, Rilling JK, van den Heuvel MP.  
661 Evolutionary expansion of connectivity between multimodal association areas  
662 in the human brain compared with chimpanzees. *Proceedings of the National*  
663 *Academy of Sciences* **116**, 7101-7106 (2019).
- 664 2. Orban GA, *et al.* Mapping the parietal cortex of human and non-human  
665 primates. *Neuropsychologia* **44**, 2647-2667 (2006).
- 666 3. Mars R, Passingham R, Neubert F, Verhagen L, Sallet J. Evolutionary  
667 specializations of human association cortex. *Kaas, JH (ed), Evolution of*  
668 *nervous systems (2nd ed, vol 4)*, 185-200 (2017).
- 669 4. Van Essen DC, Donahue CJ, Coalson TS, Kennedy H, Hayashi T, Glasser MF.  
670 Cerebral cortical folding, parcellation, and connectivity in humans, nonhuman  
671 primates, and mice. *Proceedings of the National Academy of Sciences* **116**,  
672 26173-26180 (2019).
- 673 5. Chaplin TA, Yu H-H, Soares JG, Gattass R, Rosa MG. A conserved pattern of  
674 differential expansion of cortical areas in simian primates. *Journal of*  
675 *Neuroscience* **33**, 15120-15125 (2013).
- 676 6. Van Essen DC, Dierker DL. Surface-based and probabilistic atlases of primate  
677 cerebral cortex. *Neuron* **56**, 209-225 (2007).
- 678 7. Donahue CJ, Glasser MF, Preuss TM, Rilling JK, Van Essen DC. Quantitative  
679 assessment of prefrontal cortex in humans relative to nonhuman primates.  
680 *Proceedings of the National Academy of Sciences* **115**, E5183-E5192 (2018).
- 681 8. Chance SA, Crow TJ. Distinctively human: cerebral lateralisation and  
682 language in *Homo sapiens*. *J Anthropol Sci* **85**, 83-100 (2007).
- 683 9. Hopkins WD. Neuroanatomical asymmetries and handedness in chimpanzees  
684 (*Pan troglodytes*): a case for continuity in the evolution of hemispheric  
685 specialization. *Annals of the New York Academy of Sciences* **1288**, 17 (2013).
- 686 10. Gómez-Robles A, Hopkins WD, Sherwood CC. Increased morphological  
687 asymmetry, evolvability and plasticity in human brain evolution. *Proceedings*

- 688            *of the Royal Society B: Biological Sciences* **280**, 20130575 (2013).
- 689    11.    Spocter MA, *et al.* Wernicke's area homologue in chimpanzees (Pan  
690            troglodytes) and its relation to the appearance of modern human language.  
691            *Proceedings of the Royal Society B: Biological Sciences* **277**, 2165-2174  
692            (2010).
- 693    12.    Marie D, *et al.* Left brain asymmetry of the planum temporale in a  
694            nonhominid primate: Redefining the origin of brain specialization for  
695            language. *Cerebral Cortex* **28**, 1808-1815 (2018).
- 696    13.    Lewis JW. Cortical networks related to human use of tools. *The neuroscientist*  
697            **12**, 211-231 (2006).
- 698    14.    Johnson-Frey SH, Newman-Norlund R, Grafton ST. A distributed left  
699            hemisphere network active during planning of everyday tool use skills.  
700            *Cerebral cortex* **15**, 681-695 (2005).
- 701    15.    Binder JR, Desai RH, Graves WW, Conant LL. Where is the semantic system?  
702            A critical review and meta-analysis of 120 functional neuroimaging studies.  
703            *Cerebral cortex* **19**, 2767-2796 (2009).
- 704    16.    Johnson-Frey SH. The neural bases of complex tool use in humans. *Trends in*  
705            *cognitive sciences* **8**, 71-78 (2004).
- 706    17.    Kaas JH. The evolution of neocortex in primates. In: *Progress in brain*  
707            *research*). Elsevier (2012).
- 708    18.    Passingham RE, Stephan KE, Kötter R. The anatomical basis of functional  
709            localization in the cortex. *Nature Reviews Neuroscience* **3**, 606-616 (2002).
- 710    19.    Caspers S, Geyer S, Schleicher A, Mohlberg H, Amunts K, Zilles K. The  
711            human inferior parietal cortex: cytoarchitectonic parcellation and  
712            interindividual variability. *Neuroimage* **33**, 430-448 (2006).
- 713    20.    Fan L, *et al.* The human brainnetome atlas: a new brain atlas based on  
714            connectional architecture. *Cerebral cortex* **26**, 3508-3526 (2016).
- 715    21.    Eickhoff SB, Yeo BT, Genon S. Imaging-based parcellations of the human  
716            brain. *Nature Reviews Neuroscience* **19**, 672-686 (2018).

- 717 22. Wang J, Yang Y, Zhao X, Zuo Z, Tan L-H. Evolutional and developmental  
718 anatomical architecture of the left inferior frontal gyrus. *NeuroImage* **222**,  
719 117268 (2020).
- 720 23. Mars RB, *et al.* Diffusion-weighted imaging tractography-based parcellation  
721 of the human parietal cortex and comparison with human and macaque  
722 resting-state functional connectivity. *Journal of Neuroscience* **31**, 4087-4100  
723 (2011).
- 724 24. Kong X-Z, *et al.* Mapping cortical brain asymmetry in 17,141 healthy  
725 individuals worldwide via the ENIGMA Consortium. *Proc Natl Acad Sci USA*  
726 **115**, E5154-E5163 (2018).
- 727 25. Crosson PL, Forkel SJ, Cerliani L, Thiebaut de Schotten M. Structural  
728 variability across the primate brain: a cross-species comparison. *Cerebral*  
729 *Cortex* **28**, 3829-3841 (2018).
- 730 26. Ocklenburg S, Friedrich P, Güntürkün O, Genç E. Intrahemispheric white  
731 matter asymmetries: the missing link between brain structure and functional  
732 lateralization? *Reviews in the Neurosciences* **27**, 465-480 (2016).
- 733 27. Changeux J-P, Goulas A, Hilgetag CC. Feature Article: A Connectomic  
734 Hypothesis for the Hominization of the Brain. *Cerebral Cortex*, (2020).
- 735 28. Reyes LD. Tool-use and the chimpanzee brain: an investigation of gray and  
736 white matter, and a focused study of inferior parietal microstructure.). The  
737 George Washington University (2017).
- 738 29. Pandya DN, Seltzer B. Intrinsic connections and architectonics of posterior  
739 parietal cortex in the rhesus monkey. *Journal of Comparative Neurology* **204**,  
740 196-210 (1982).
- 741 30. Bailey P, Bonin GV, McCulloch WS. The isocortex of the chimpanzee.  
742 (1950).
- 743 31. von Economo CF, Koskinas GN. *Die cytoarchitektonik der hirnrinde des*  
744 *erwachsenen menschen*. J. Springer (1925).
- 745 32. Von Bonin G, and Percival Bailey. *The neocortex of Macaca mulatta* (1947).

- 746 33. Yarkoni T, Poldrack RA, Nichols TE, Van Essen DC, Wager TD. Large-scale  
747 automated synthesis of human functional neuroimaging data. *Nature methods*  
748 **8**, 665-670 (2011).
- 749 34. Smaers JB, Gómez-Robles A, Parks AN, Sherwood CC. Exceptional  
750 evolutionary expansion of prefrontal cortex in great apes and humans. *Current*  
751 *Biology* **27**, 714-720 (2017).
- 752 35. Passingham RE, Smaers JB. Is the prefrontal cortex especially enlarged in the  
753 human brain? Allometric relations and remapping factors. *Brain, behavior and*  
754 *evolution* **84**, 156-166 (2014).
- 755 36. Gabi M, *et al.* No relative expansion of the number of prefrontal neurons in  
756 primate and human evolution. *Proceedings of the National Academy of*  
757 *Sciences* **113**, 9617-9622 (2016).
- 758 37. Stout D, Chaminade T. Stone tools, language and the brain in human evolution.  
759 *Philosophical Transactions of the Royal Society B: Biological Sciences* **367**,  
760 75-87 (2012).
- 761 38. Hecht EE, Gutman DA, Preuss TM, Sanchez MM, Parr LA, Rilling JK.  
762 Process versus product in social learning: comparative diffusion tensor  
763 imaging of neural systems for action execution–observation matching in  
764 macaques, chimpanzees, and humans. *Cerebral Cortex* **23**, 1014-1024 (2013).
- 765 39. Hopkins WD, Marino L, Rilling JK, MacGregor LA. Planum temporale  
766 asymmetries in great apes as revealed by magnetic resonance imaging (MRI).  
767 *NeuroReport* **9**, 2913-2918 (1998).
- 768 40. Gannon PJ, Holloway RL, Broadfield DC, Braun AR. Asymmetry of  
769 chimpanzee planum temporale: humanlike pattern of Wernicke's brain  
770 language area homolog. *Science* **279**, 220-222 (1998).
- 771 41. Balezeau F, *et al.* Primate auditory prototype in the evolution of the arcuate  
772 fasciculus. *Nature Neuroscience* **23**, 611-614 (2020).
- 773 42. Vigneau M, *et al.* Meta-analyzing left hemisphere language areas: phonology,  
774 semantics, and sentence processing. *Neuroimage* **30**, 1414-1432 (2006).

- 775 43. Hopkins WD, Tagliabue JP, Nir T, Schenker NM, Sherwood CC. A  
776 voxel-based morphometry analysis of white matter asymmetries in  
777 chimpanzees (*Pan troglodytes*). *Brain, behavior and evolution* **76**, 93-100  
778 (2010).
- 779 44. Goldberg E, *et al.* Hemispheric asymmetries of cortical volume in the human  
780 brain. *Cortex* **49**, 200-210 (2013).
- 781 45. Catani M, *et al.* Short parietal lobe connections of the human and monkey  
782 brain. *Cortex* **97**, 339-357 (2017).
- 783 46. De Schotten MT, *et al.* A lateralized brain network for visuo-spatial attention.  
784 *Nature Precedings*, 1-1 (2011).
- 785 47. Povinelli DJ, Reaux JE, Theall LA, Giambrone S, Humphrey N. *Folk physics*  
786 *for apes: The chimpanzee's theory of how the world works*. Oxford University  
787 Press Oxford (2000).
- 788 48. Wolpert DM, Goodbody SJ, Husain M. Maintaining internal representations:  
789 the role of the human superior parietal lobe. *Nature neuroscience* **1**, 529-533  
790 (1998).
- 791 49. Amunts K, *et al.* Asymmetry in the human motor cortex and handedness.  
792 *Neuroimage* **4**, 216-222 (1996).
- 793 50. Amunts K, *et al.* Motor cortex and hand motor skills: structural compliance in  
794 the human brain. *Human brain mapping* **5**, 206-215 (1997).
- 795 51. Hopkins WD, *et al.* Motor skill for tool-use is associated with asymmetries in  
796 Broca's area and the motor hand area of the precentral gyrus in chimpanzees  
797 (*Pan troglodytes*). *Behavioural Brain Research* **318**, 71-81 (2017).
- 798 52. Gilissen EP, Hopkins WD. Asymmetries of the parietal operculum in  
799 chimpanzees (*Pan troglodytes*) in relation to handedness for tool use. *Cerebral*  
800 *Cortex* **23**, 411-422 (2013).
- 801 53. Hartwigsen G, Neef NE, Camilleri JA, Margulies DS, Eickhoff SB. Functional  
802 segregation of the right inferior frontal gyrus: evidence from  
803 coactivation-based parcellation. *Cerebral Cortex* **29**, 1532-1546 (2019).



- 804 54. Ringo JL, Doty RW, Demeter S, Simard PY. Time is of the essence: a  
805 conjecture that hemispheric specialization arises from interhemispheric  
806 conduction delay. *Cerebral Cortex* **4**, 331-343 (1994).
- 807 55. Phillips KA, *et al.* The corpus callosum in primates: processing speed of axons  
808 and the evolution of hemispheric asymmetry. *Proceedings of the Royal Society*  
809 *B: Biological Sciences* **282**, 20151535 (2015).
- 810 56. Van Essen DC, *et al.* The WU-Minn human connectome project: an overview.  
811 *Neuroimage* **80**, 62-79 (2013).
- 812 57. Chen X, *et al.* Brain aging in humans, chimpanzees (*Pan troglodytes*), and  
813 rhesus macaques (*Macaca mulatta*): magnetic resonance imaging studies of  
814 macro-and microstructural changes. *Neurobiology of aging* **34**, 2248-2260  
815 (2013).
- 816 58. Shen K, Bezgin G, Schirner M, Ritter P, Everling S, McIntosh AR. A macaque  
817 connectome for large-scale network simulations in TheVirtualBrain. *Scientific*  
818 *data* **6**, 1-12 (2019).
- 819 59. Glasser MF, *et al.* The minimal preprocessing pipelines for the Human  
820 Connectome Project. *Neuroimage* **80**, 105-124 (2013).
- 821 60. Robinson EC, *et al.* MSM: a new flexible framework for Multimodal Surface  
822 Matching. *Neuroimage* **100**, 414-426 (2014).
- 823 61. Coalson TS, Van Essen DC, Glasser MF. The impact of traditional  
824 neuroimaging methods on the spatial localization of cortical areas.  
825 *Proceedings of the National Academy of Sciences* **115**, E6356-E6365 (2018).
- 826 62. St-Onge E, Daducci A, Girard G, Descoteaux M. Surface-enhanced  
827 tractography (SET). *NeuroImage* **169**, 524-539 (2018).
- 828 63. Desikan RS, *et al.* An automated labeling system for subdividing the human  
829 cerebral cortex on MRI scans into gyral based regions of interest. *Neuroimage*  
830 **31**, 968-980 (2006).
- 831 64. Rohlfing T, *et al.* The INIA19 template and NeuroMaps atlas for primate brain  
832 image parcellation and spatial normalization. *Frontiers in neuroinformatics* **6**,

- 833            27 (2012).
- 834    65.    Bryant KL, Li L, Eichert N, Mars RB. A comprehensive atlas of white matter  
835            tracts in the chimpanzee. *PLoS biology* **18**, e3000971 (2020).
- 836    66.    Warrington S, *et al.* XTRACT-Standardised protocols for automated  
837            tractography in the human and macaque brain. *Neuroimage*, 116923 (2020).
- 838    67.    Winkler AM, Ridgway GR, Webster MA, Smith SM, Nichols TE. Permutation  
839            inference for the general linear model. *Neuroimage* **92**, 381-397 (2014).
- 840
